# Supplementary material for: Nutrient control of eukaryote cell growth: a systems biology study in yeast
Source: PubMed Central journal article supplement (PMC2895586; doi:10.1186/1741-7007-8-68), 2010-05-24
Supplement: 1741-7007-8-68-S11.pdf [file 1741-7007-8-68-S11.pdf]

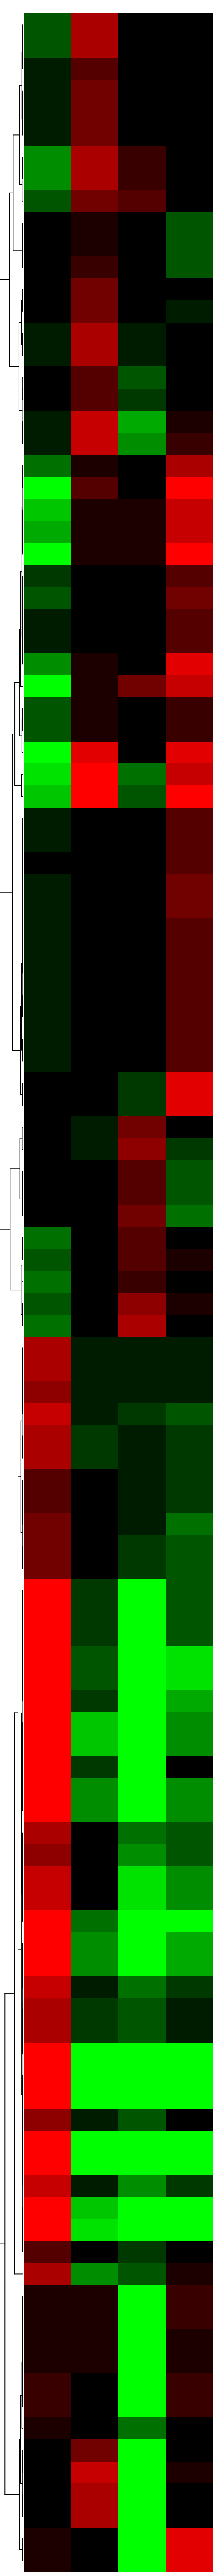

- proton-transporting V-type ATPase complex
- vacuolar proton-transporting V-type ATPase complex
- membrane of vacuole with cell cycle-correlated morphology
- lytic vacuole
- storage vacuole
- vacuole, cell cycle-correlated morphology
- vacuolar part
- vacuolar membrane
- vacuole
- condensed nuclear chromosome
- chromosome, pericentric region
- nucleosome
- chromosomal part
- chromosome
- intracellular non-membrane-bound organelle
- non-membrane-bound organelle
- chromatin remodeling complex
- transcription factor complex
- nucleoplasm part
- nucleoplasm
- nucleolar part
- nucleolus
- nuclear envelope-endoplasmic reticulum network
- endoplasmic reticulum membrane
- endoplasmic reticulum part
- small subunit processome
- endoplasmic reticulum lumen
- intrinsic to endoplasmic reticulum membrane
- integral to endoplasmic reticulum membrane
- endomembrane system
- endoplasmic reticulum
- rough endoplasmic reticulum membrane
- rough endoplasmic reticulum
- nucleus
- nuclear part
- nuclear lumen
- cytoplasmic vesicle membrane
- vesicle membrane
- polysome
- membrane-bound vesicle
- cytoplasmic membrane-bound vesicle
- cytoplasmic vesicle part
- vesicle
- cytoplasmic vesicle
- coated vesicle
- Golgi-associated vesicle
- nuclear membrane part
- Golgi apparatus
- cell part
- cell
- anchored to membrane
- extracellular region
- external encapsulating structure
- cell wall
- fungal-type cell wall
- intrinsic to plasma membrane
- integral to membrane
- integral to plasma membrane
- intrinsic to membrane
- plasma membrane
- organelle outer membrane
- mitochondrial outer membrane
- outer membrane
- integral to mitochondrial membrane
- integral to mitochondrial outer membrane
- intrinsic to mitochondrial outer membrane
- microbody
- peroxisome
- peroxisomal matrix
- peroxisomal part
- microbody part
- mitochondrial large ribosomal subunit
- organellar large ribosomal subunit
- large ribosomal subunit
- mitochondrial ribosome
- organellar ribosome
- ribosomal subunit
- mitochondrial lumen
- mitochondrial matrix
- cytoplasmic part
- envelope
- organelle envelope
- proton-transporting two-sector ATPase complex
- small ribosomal subunit
- mitochondrial small ribosomal subunit
- organellar small ribosomal subunit
- mitochondrial respiratory chain
- proton-transporting ATP synthase complex
- mitochondrial proton-transporting ATP synthase complex
- organelle envelope lumen
- mitochondrial nucleoid
- nucleoid
- mitochondrion
- mitochondrial membrane part
- mitochondrial part
- intrinsic to Golgi membrane
- mitochondrial membrane
- mitochondrial envelope
- mitochondrial intermembrane space
- organelle inner membrane
- mitochondrial inner membrane
- proton-transporting two-sector ATPase complex, proton-transporting domain
- cytoplasm
- organelle lumen
- membrane-enclosed lumen
- intracellular organelle
- organelle
- intracellular membrane-bound organelle
- membrane-bound organelle
- organelle membrane
- protein complex
- macromolecular complex
- intracellular organelle part
- organelle part
- intracellular part
- intracellular

C Z P S
