# Supplementary material for: Nutrient control of eukaryote cell growth: a systems biology study in yeast
Source: PubMed Central journal article supplement (PMC2895586; doi:10.1186/1741-7007-8-68), 2010-05-24

# YDR345C

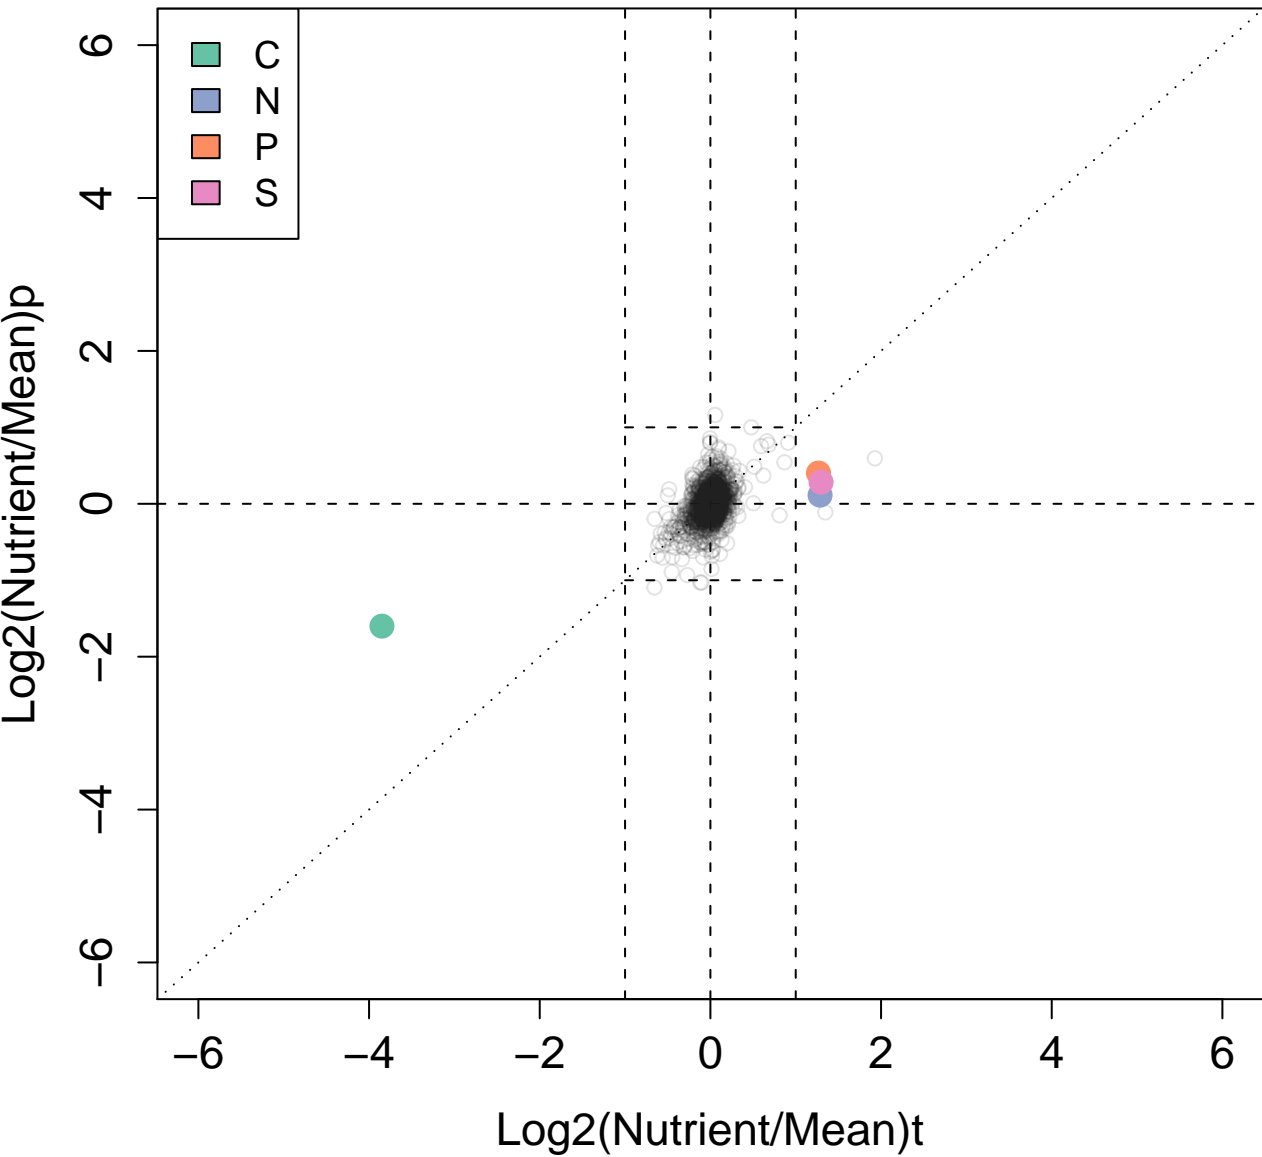

Supplement: 1741-7007-8-68-S23.pdf [file 1741-7007-8-68-S23.pdf]
